# Supplementary material for: A Polypyrrole/Nanoclay Hybrid Film for Ultra-Sensitive Cardiac Troponin T Electrochemical Immunosensor
Source: MDPI journal article supplement (doi:10.3390/bios12070545), 2022-07-21
Supplement: s1 [file s1]

## SUPPORT INFORMATION

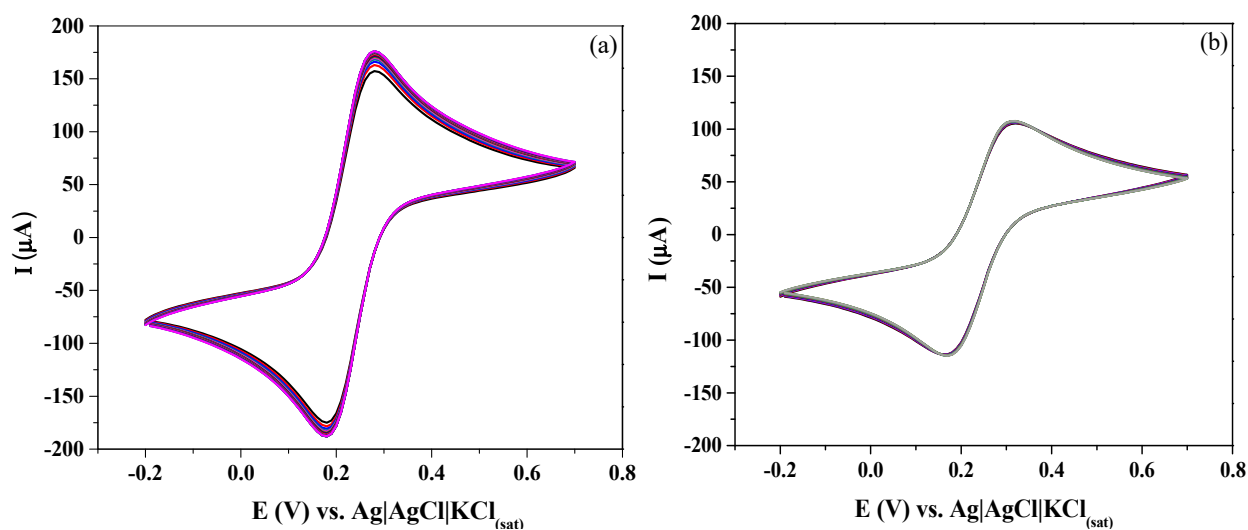

**Figure S1.** Electrochemical stability of the modified GCE with  $\text{NH}_2\text{-NCY}$  film (a) and  $\text{NH}_2\text{-NCY}$  and  $\text{COOH-PPy}$  film (b) when submitted to 20 successive voltammetric cycles. Measurements performed in  $5 \text{ mmol L}^{-1} \text{ K}_3\text{Fe}(\text{CN})_6/\text{K}_4\text{Fe}(\text{CN})_6$  prepared in  $0.1 \text{ mol L}^{-1} \text{ KCl}$ .

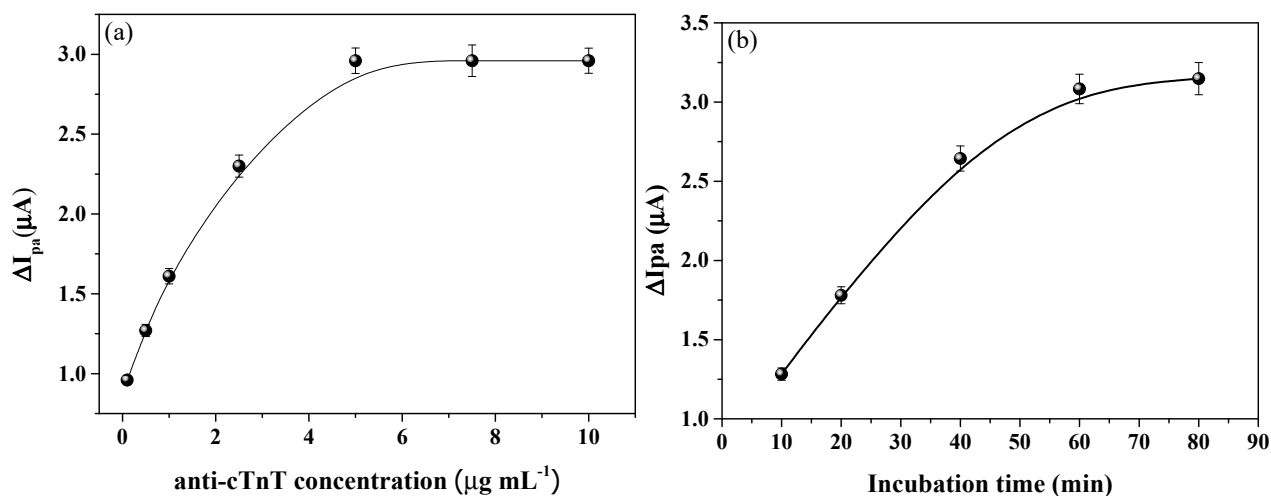

**Figure S2.** Influence of the anti-cTnT concentration (a) and incubation time of the cTnT (b) on the anodic current response by SWV measurements performed in  $5 \text{ mmol L}^{-1} [\text{Fe}(\text{CN})_6]^{3-/4-}$  solution prepared in  $0.1 \text{ mol L}^{-1} \text{ KCl}$ .

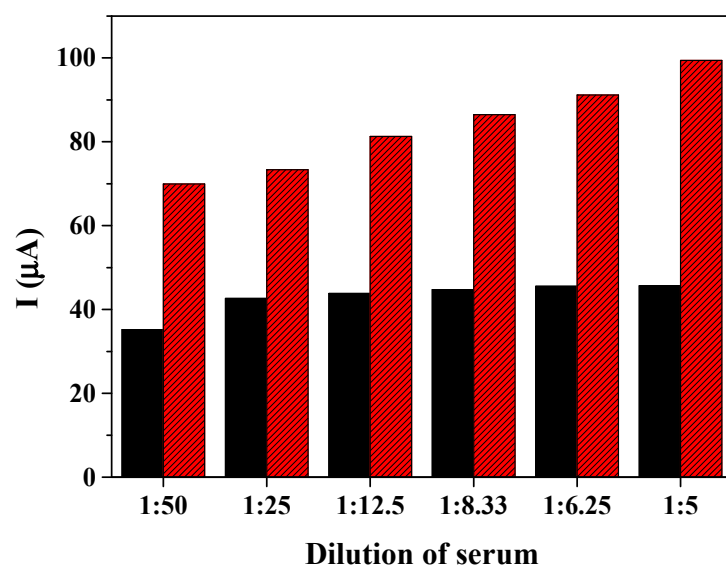

**Figure S3.** Current intensity response of the immunosensor for different serum dilutions (1:50; 1:25; 1:12,25; 1:8,33; 1:6,25; 1:5) by SWV measurements performed in 5 mmol L<sup>-1</sup> [Fe(CN)<sub>6</sub>]<sup>3-/4-</sup> solution prepared in 0.1 mol L<sup>-1</sup> KCl. Black bars represent the serum in absence of cTnT and the red bars represent the serum spiked with 50 pg mL<sup>-1</sup> cTnT.
